# Supplementary material
Source: PubMed Central journal article supplement (PMC7964733)
Supplement: 3694_materials.pdf [file 3694_materials.pdf]

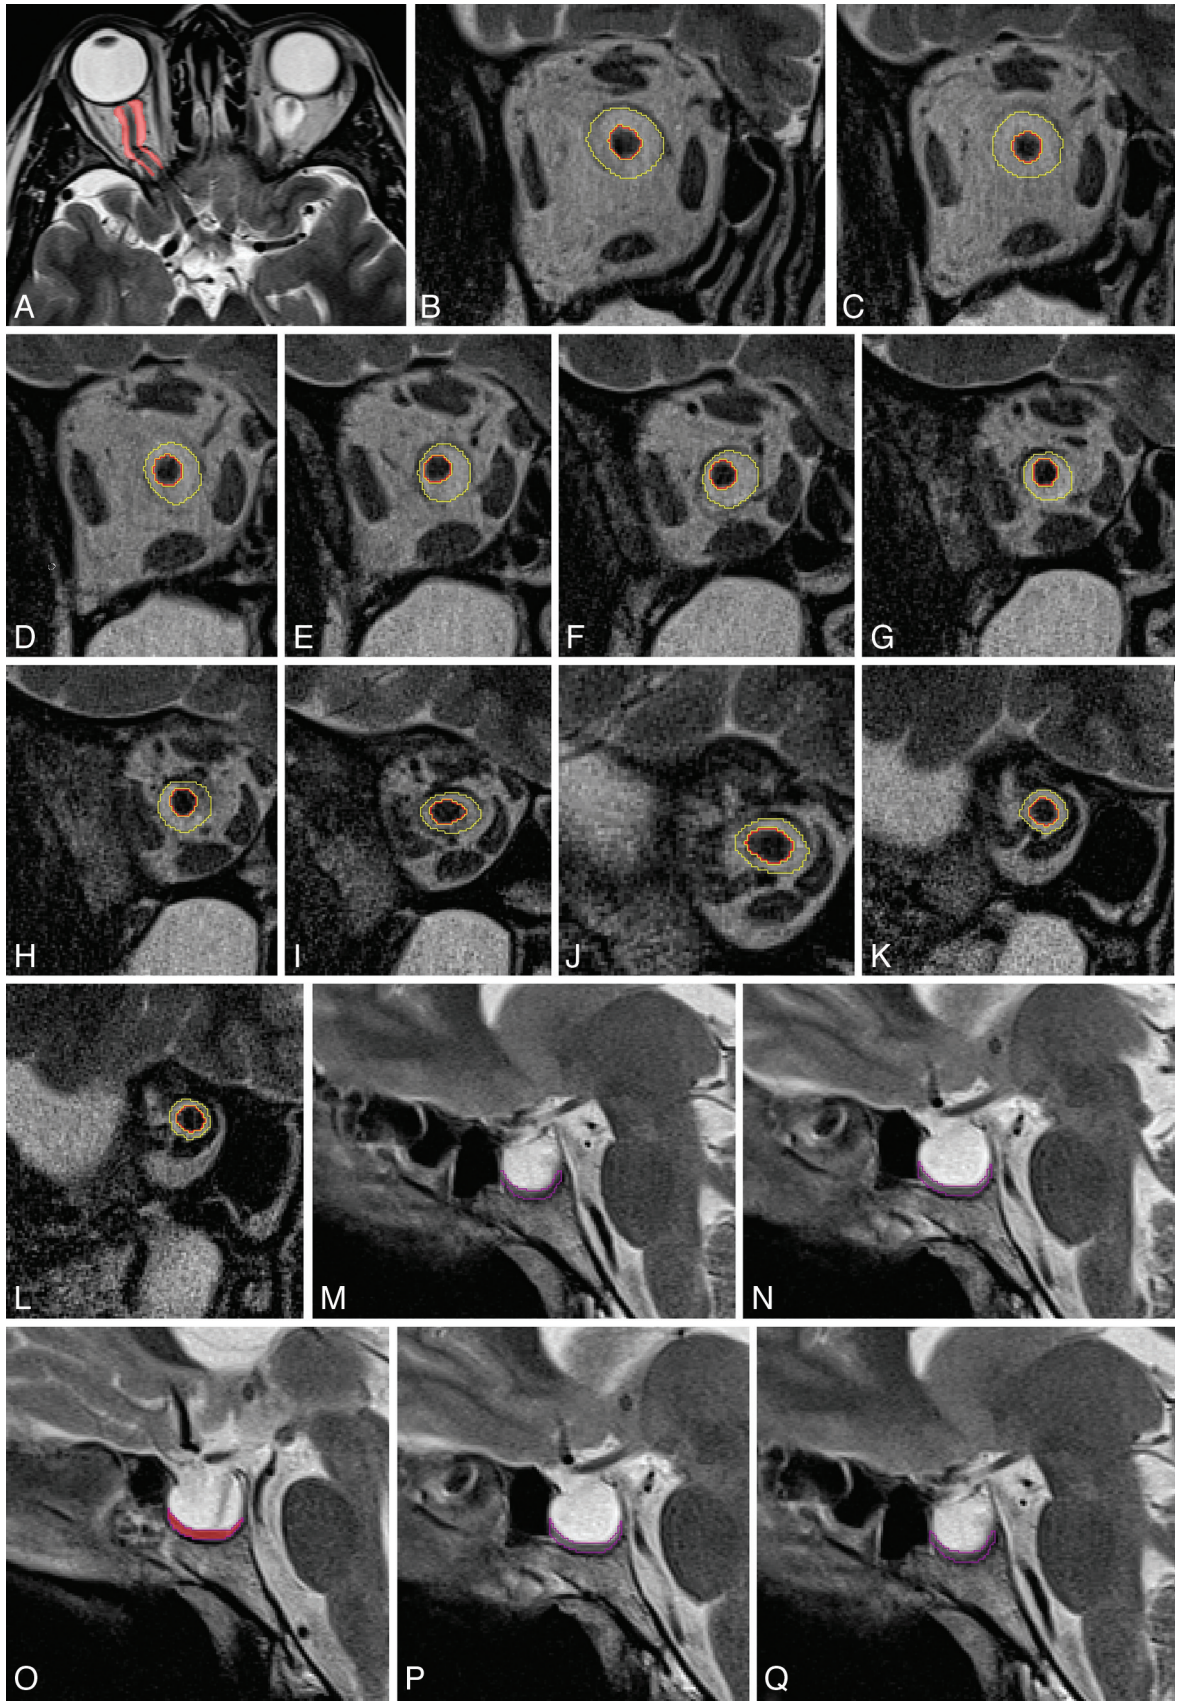

**ON-LINE FIG 1.** Voxel-based volume segmentation of ON, ONS, and hypophysis for each MR imaging section. As an example, patient 4 was chosen for a typical radiomorphologic presentation of IIH. A, Segmentation of ONS (red) in the axial plane shows severe tortuosity of the right ON. B–L, Coronal scans with selection of distended ONS and ON of the right optic tract (corresponding to A). Given planes are in order of rising distance to the papilla of the right ON (B = 2 mm, C = 4 mm, D = 6 mm, E = 8 mm, F = 10 mm, G = 12 mm, H = 14 mm, I = 16 mm, J = 18 mm, K = 20 mm, L = 22 mm). M–Q, Sagittal scans with selection of compressed hypophysis tissue in order from left to right (O indicates volume segmentation in the midsagittal plane [red] with visible infundibulum above the hypophysis; distance to midsagittal plane [–, left; +, right]; M, –4.5 mm; N, –1.5 mm; P, +1.5 mm; Q, +4.5 mm).

**On-line Table: Clinical profile of patients**

| No.          | Sex        | Age (yr)      | BMI (kg/m <sup>2</sup> ) | CSF Opening Pressure Maximum (cm H <sub>2</sub> O) | Pain Intensity Maximum (VAS) | Post-puncture Relief of Pain | Light Sensitivity | Noise Sensitivity | Tinnitus | Pulsatile Tinnitus | Vertigo | Visual Disturbances      |                            |         |              |         |             |                |          |
|--------------|------------|---------------|--------------------------|----------------------------------------------------|------------------------------|------------------------------|-------------------|-------------------|----------|--------------------|---------|--------------------------|----------------------------|---------|--------------|---------|-------------|----------------|----------|
|              |            |               |                          |                                                    |                              |                              |                   |                   |          |                    |         | Reported Impaired Vision | Worsening of Visual Acuity | Flashes | Obscurements | Scotoma | Papilledema | Blurred Vision | Diplopia |
| 1            | F          | 48            | 46.02                    | 32.0                                               | 8.00                         | -                            | -                 | -                 | -        | -                  | -       | -                        | -                          | -       | -            | -       | -           | -              | -        |
| 2            | M          | 32            | 28.41                    | 30.0                                               | 4.00                         | -                            | -                 | -                 | -        | -                  | -       | -                        | -                          | -       | -            | -       | -           | -              | -        |
| 3            | M          | 61            | 33.65                    | 32.5                                               | 4.86                         | -                            | +                 | +                 | +        | +                  | +       | +                        | +                          | +       | +            | +       | +           | +              | +        |
| 4            | F          | 44            | 32.02                    | -                                                  | 8.65                         | -                            | +                 | +                 | +        | +                  | +       | +                        | +                          | +       | +            | +       | +           | +              | +        |
| 5            | F          | 21            | 24.09                    | 40.0                                               | 7.97                         | +                            | +                 | +                 | +        | +                  | +       | +                        | +                          | +       | +            | +       | +           | +              | +        |
| 6            | F          | 27            | 30.46                    | 43.0                                               | 7.57                         | +                            | +                 | +                 | +        | +                  | +       | +                        | +                          | +       | +            | +       | +           | +              | +        |
| 7            | F          | 30            | 28.28                    | 42.0                                               | 1.89                         | +                            | -                 | -                 | -        | -                  | -       | -                        | -                          | -       | -            | -       | -           | -              | -        |
| 8            | F          | 46            | 49.01                    | 43.0                                               | 0.95                         | +                            | +                 | +                 | +        | +                  | +       | +                        | +                          | +       | +            | +       | +           | +              | +        |
| 9            | F          | 20            | 29.40                    | 30.0                                               | 9.05                         | +                            | +                 | +                 | +        | +                  | +       | +                        | +                          | +       | +            | +       | +           | +              | +        |
| 10           | F          | 28            | 31.71                    | 39.0                                               | 9.30                         | +                            | +                 | +                 | +        | +                  | +       | +                        | +                          | +       | +            | +       | +           | +              | +        |
| 11           | F          | 63            | 26.29                    | 31.0                                               | 5.68                         | +                            | +                 | +                 | +        | +                  | +       | +                        | +                          | +       | +            | +       | +           | +              | +        |
| 12           | F          | 61            | 38.14                    | 31.0                                               | 7.97                         | +                            | +                 | +                 | +        | +                  | +       | +                        | +                          | +       | +            | +       | +           | +              | +        |
| 13           | F          | 40            | 40.90                    | 50.0                                               | 9.59                         | +                            | +                 | +                 | +        | +                  | +       | +                        | +                          | +       | +            | +       | +           | +              | +        |
| 14           | F          | 41            | 32.32                    | 35.0                                               | 9.73                         | +                            | +                 | +                 | +        | +                  | +       | +                        | +                          | +       | +            | +       | +           | +              | +        |
| 15           | F          | 20            | 33.56                    | 40.0                                               | 9.86                         | +                            | +                 | +                 | +        | +                  | +       | +                        | +                          | +       | +            | +       | +           | +              | +        |
| 16           | F          | 33            | 54.57                    | 31.0                                               | 8.51                         | +                            | +                 | +                 | +        | +                  | +       | +                        | +                          | +       | +            | +       | +           | +              | +        |
| 17           | M          | 27            | 29.04                    | 31.0                                               | 2.70                         | -                            | -                 | -                 | -        | -                  | -       | -                        | -                          | -       | -            | -       | -           | -              | -        |
| 18           | F          | 35            | 36.76                    | 50.0                                               | 6.49                         | +                            | +                 | +                 | +        | +                  | +       | +                        | +                          | +       | +            | +       | +           | +              | +        |
| 19           | F          | 56            | 30.85                    | 36.0                                               | 9.00                         | +                            | +                 | +                 | +        | +                  | +       | +                        | +                          | +       | +            | +       | +           | +              | +        |
| 20           | F          | 25            | 31.22                    | 50.0                                               | 9.80                         | +                            | +                 | +                 | +        | +                  | +       | +                        | +                          | +       | +            | +       | +           | +              | +        |
| 21           | F          | 41            | 25.88                    | 29.0                                               | 7.84                         | +                            | +                 | +                 | +        | +                  | +       | +                        | +                          | +       | +            | +       | +           | +              | +        |
| 22           | F          | 33            | 26.61                    | 42.0                                               | 7.70                         | +                            | +                 | +                 | +        | +                  | +       | +                        | +                          | +       | +            | +       | +           | +              | +        |
| 23           | F          | 20            | 31.64                    | 40.0                                               | 6.00                         | +                            | +                 | +                 | +        | +                  | +       | +                        | +                          | +       | +            | +       | +           | +              | +        |
| Ratio/mean/% | F/M = 20/3 | 37.04 ± 13.72 | 33.51 ± 7.67             | 37.61 ± 6.93                                       | 7.09 ± 2.62                  | 78.26%                       | 60.87%            | 52.17%            | 39.13%   | 17.39%             | 60.87%  | 60.87%                   | 43.48%                     | 73.91%  | 56.52%       | 52.17%  | 43.48%      | 43.48%         |          |

**Note:**—L indicates left; R, right; -, negative for this finding; +, positive for this finding; BMI, body mass index; VAS, visual analog scale.
